# Supplementary material
Source: publisher site journal article supplement (https://www.spandidos-publications.com/6204/downloadSupplementary)

Figure S1. (A) Forest plot for lobar (location). The results demonstrated no statistically significant difference between the surgical or/+ SRS and Cons (OR, 1.03; 95% CI, 0.55 to 1.93;  $P=0.07$ ). (B) Funnel plot, testing the sensitivity of the lobar (location); there was heterogeneity ( $P=0.92$  and  $I^2=62\%$ ). In addition, after the applying 'leave out one' model, no statistically significant result was obtained (Table III). SRS, radiotherapy; Cons, conservative management group; OR, odds ratio;  $I^2$ , the percentage of total variation across studies that is due to heterogeneity rather than chance; CI, confidence interval.

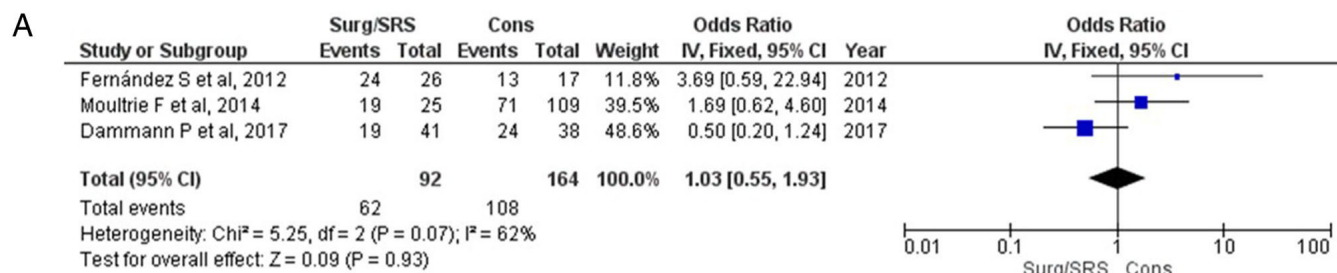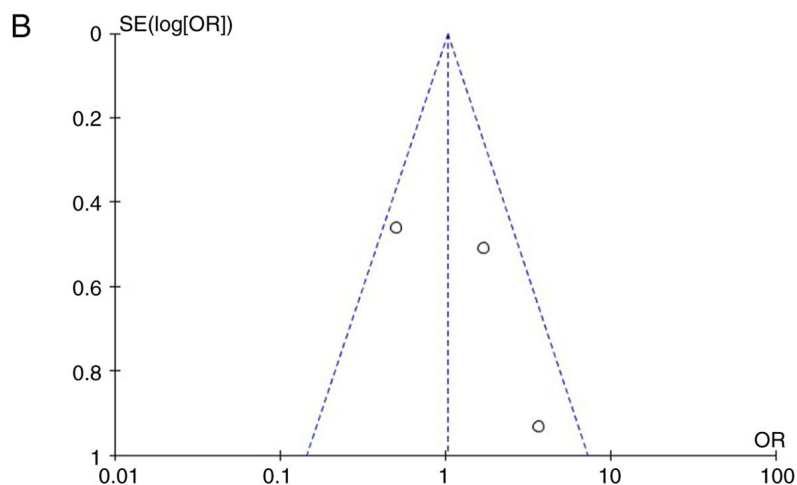

Figure S2. (A) Forest plot for deep (location). The results demonstrated no statistically significant difference between the surgical or/+ SRS and Cons (OR, 0.62; 95% CI, 0.27 to 1.43; P=0.87). (B) Funnel plot, testing the sensitivity of deep (location); there was no heterogeneity (P=0.26 and I<sup>2</sup>=0 %). In addition, after the applying ‘leave out one’ model, no statistically significant result was obtained (Table III). SRS, radiotherapy; Cons, conservative management group; OR, odds ratio; I<sup>2</sup>, the percentage of total variation across studies that is due to heterogeneity rather than chance; CI, confidence interval.

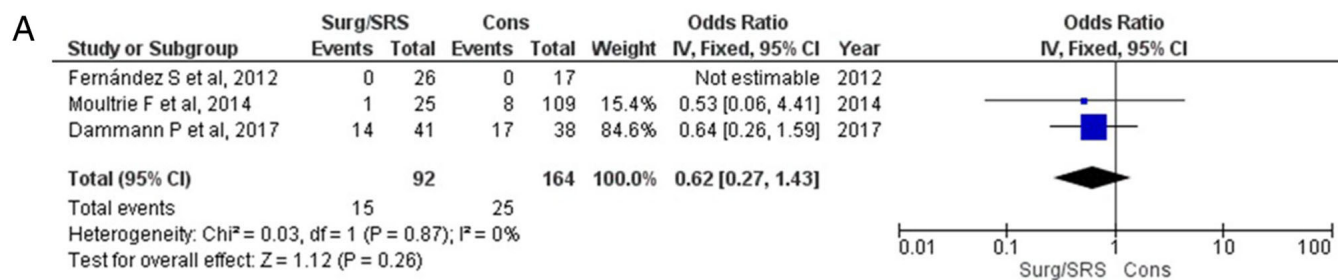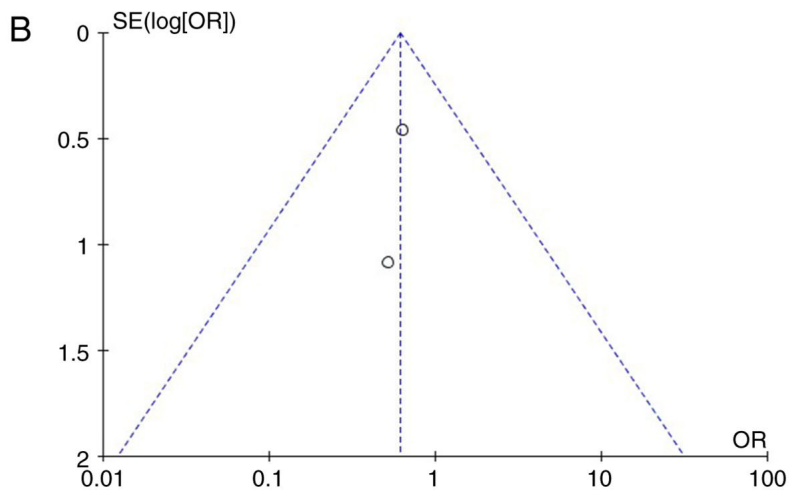

Figure S3. (A) Forest plot for brainstem (location). The results demonstrated no statistically significant difference between the surgical or/+ SRS and Cons (OR, 0.24; 95% CI, 0.03 to 1.92; P=0.18). (B) Funnel plot, testing the sensitivity of the brainstem (location): there was no heterogeneity. In addition, after the applying ‘leave out one’ model, no statistically significant result was obtained (Table III). SRS, radiotherapy; Cons, that is due to heterogeneity rather than chance; CI, confidence interval.

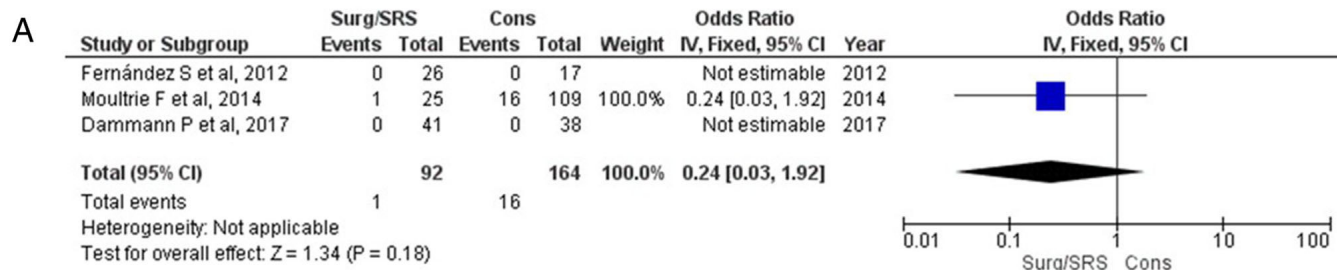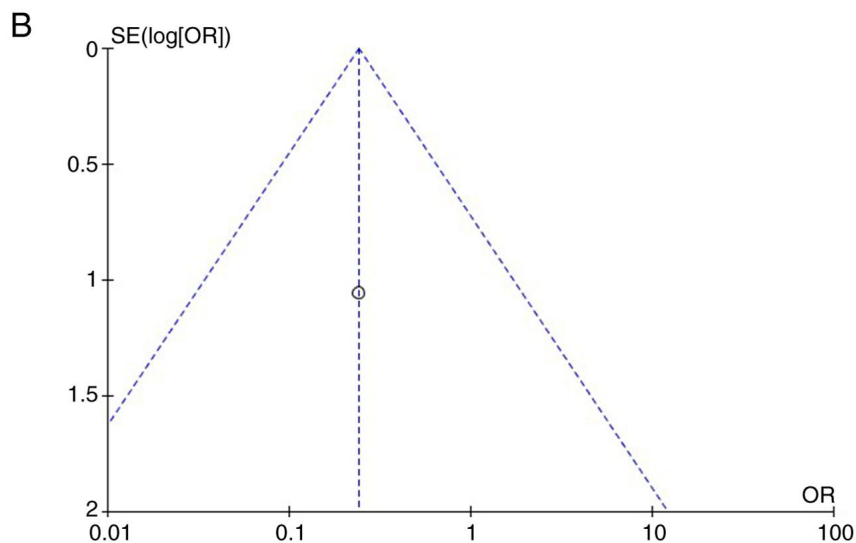

Figure S4. (A) Forest plot for cerebellum (location). The results demonstrated no statistically significant difference between the surgical or/+ SRS and Cons (OR, 1.29; 95% CI, 0.39 to 4.32; P=0.68). (B) Funnel plot, testing the sensitivity of the brainstem (location): there was no heterogeneity. In addition, after the applying 'leave out one' model, no statistically significant result was obtained (Table III). SRS, radiotherapy; Cons, conservative management group; OR, odds ratio;  $I^2$ , the percentage of total variation across studies that is due to heterogeneity rather than chance; CI, confidence interval.

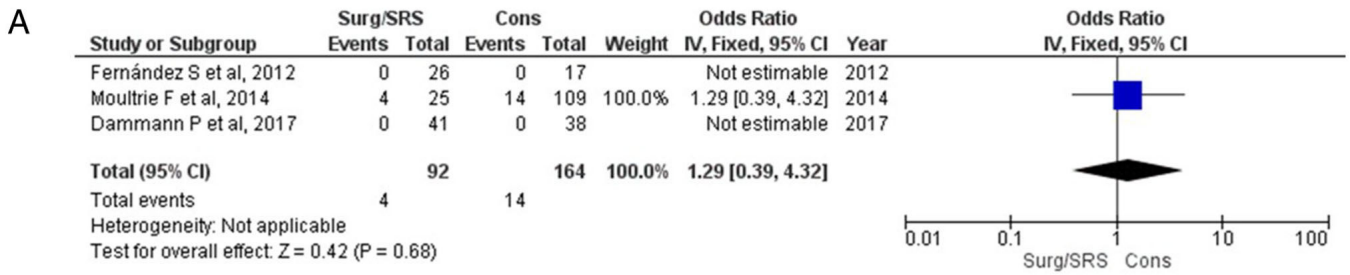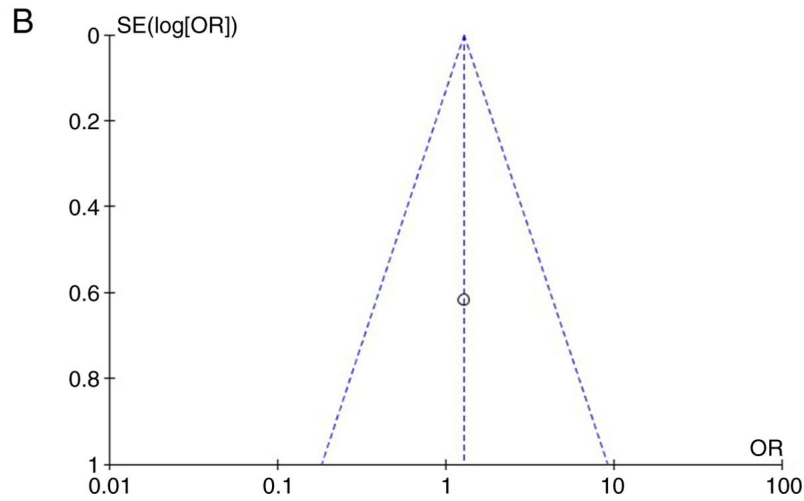

Figure S5. (A) Forest plot for OHS 2-6. The results demonstrated no statistically significant difference between the surgical or/+ SRS and Cons (OR, 1.44; 95% CI, 0.83 to 2.49; P=0.19). (B) Funnel plot, testing the sensitivity of the brainstem (location): there was no heterogeneity. In addition, after the applying 'leave out one' model, no statistically significant result was obtained (Table III). OHS, Oxford Handicap Scale; SRS, radiotherapy; Cons, conservative management group; OR, odds ratio;  $I^2$ , the percentage of total variation across studies that is due to heterogeneity rather than chance; CI, confidence interval.

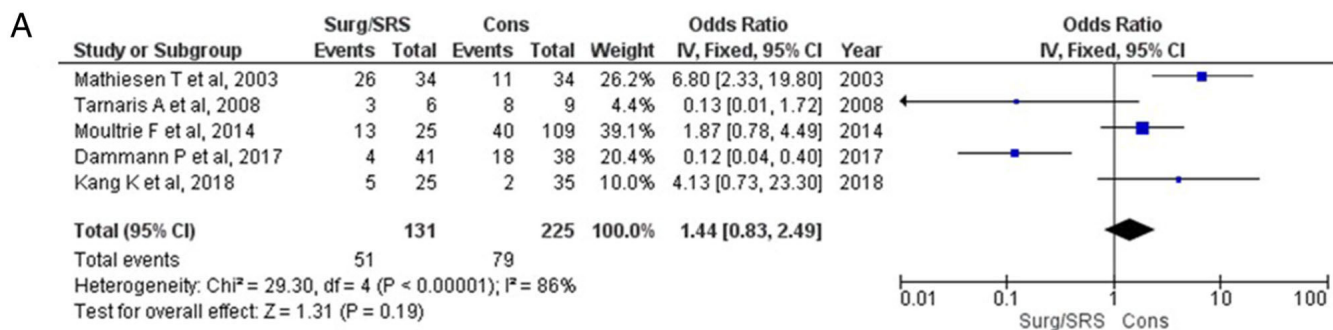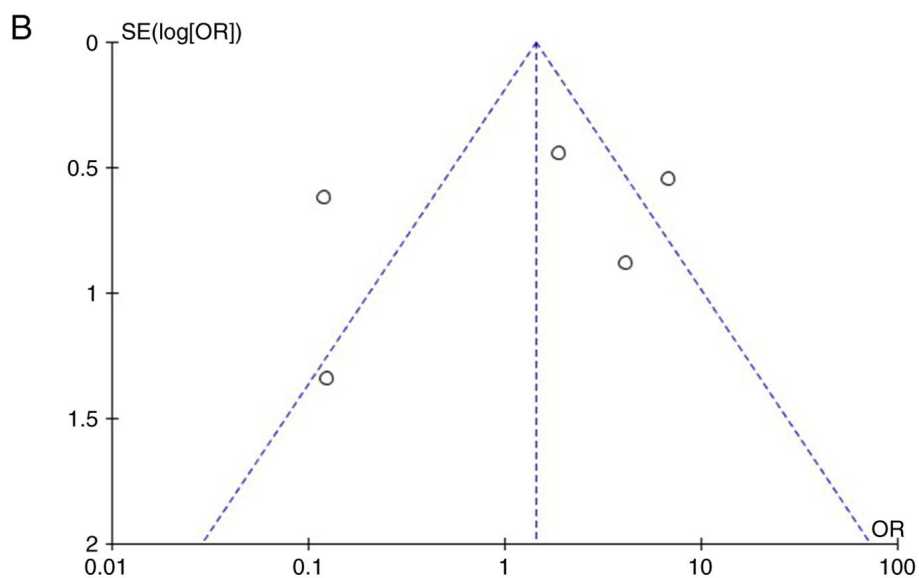

Supplement: Supplementary file 1 [file downloadSupplementary]
